# Supplementary material for: Causal associations between sexually transmitted infections, depression, and self-harm: a mendelian randomization and cross-sectional study
Source: PubMed Central journal article supplement — BMC Infect Dis. 2024 Nov 23;24:1339. doi: 10.1186/s12879-024-10218-1 (PMC11585095; doi:10.1186/s12879-024-10218-1), 2024-11-23

Figure S1: Study design

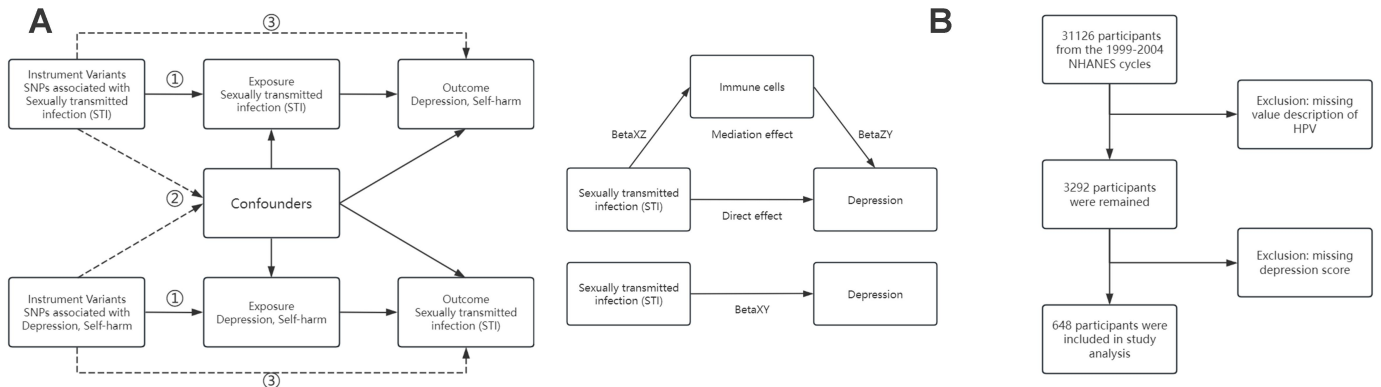

Figure S2: funnel plots and leave-one-out of MR

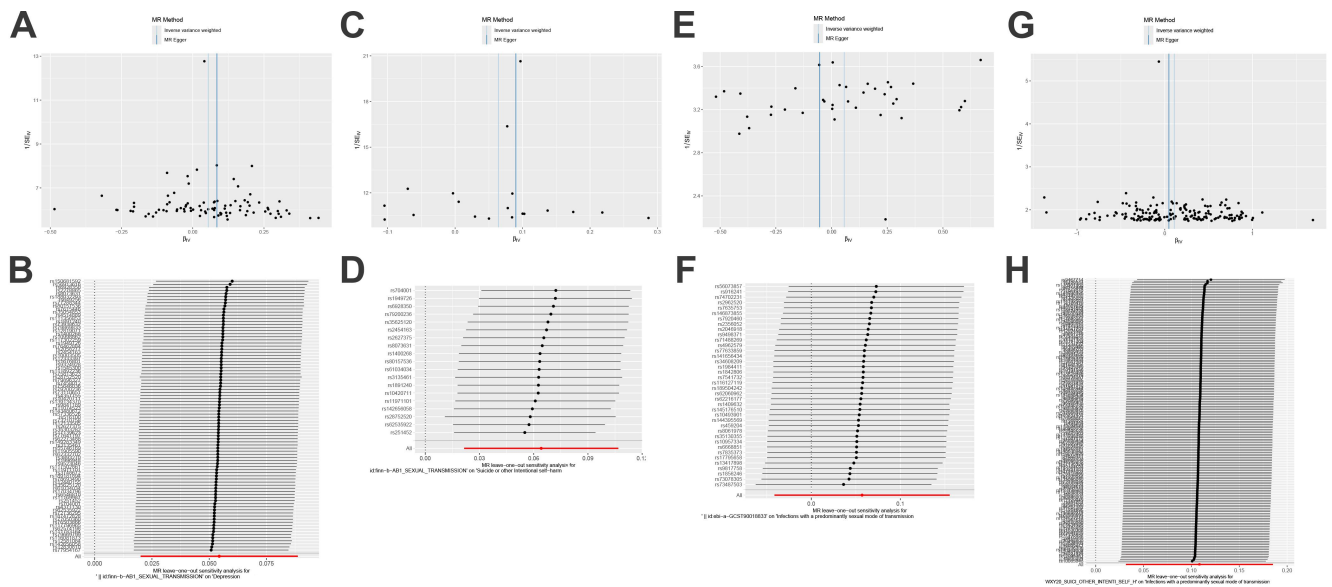

Figure S3: Forest plot for MR results of depression with 731 immune cells

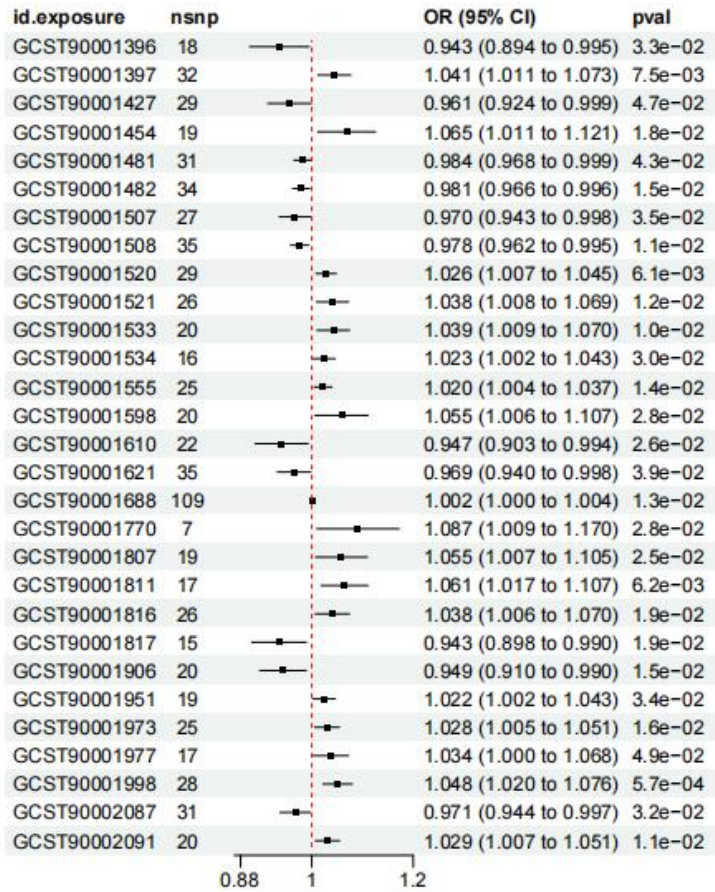

Supplement: 12879_2024_10218_MOESM1_ESM.pdf [file 12879_2024_10218_MOESM1_ESM.pdf]
